# Supplementary material for: Silicone-Thioxanthone: A Multifunctionalized Visible Light Photoinitiator with an Ability to Modify the Cured Polymers
Source: PubMed Central journal article supplement (PMC6523732; doi:10.3390/polym11040695), 2019-04-16
Supplement: polymers-11-00695-s001.pdf [file polymers-11-00695-s001.pdf]

## Supporting Information

### Silicone-thioxanthone: A multifunctionalized visible light photoinitiator with an ability to modify the cured polymers

Qingqing Wu #, Wen Liao #, Ying Xiong, Jianjing Yang, Zhen Li, Hongding Tang \*

Engineering Research Center of Organosilicon Compounds & Materials, Ministry of Education, College of Chemistry and Molecular Sciences, Wuhan University, Wuhan,

430072, P. R. China

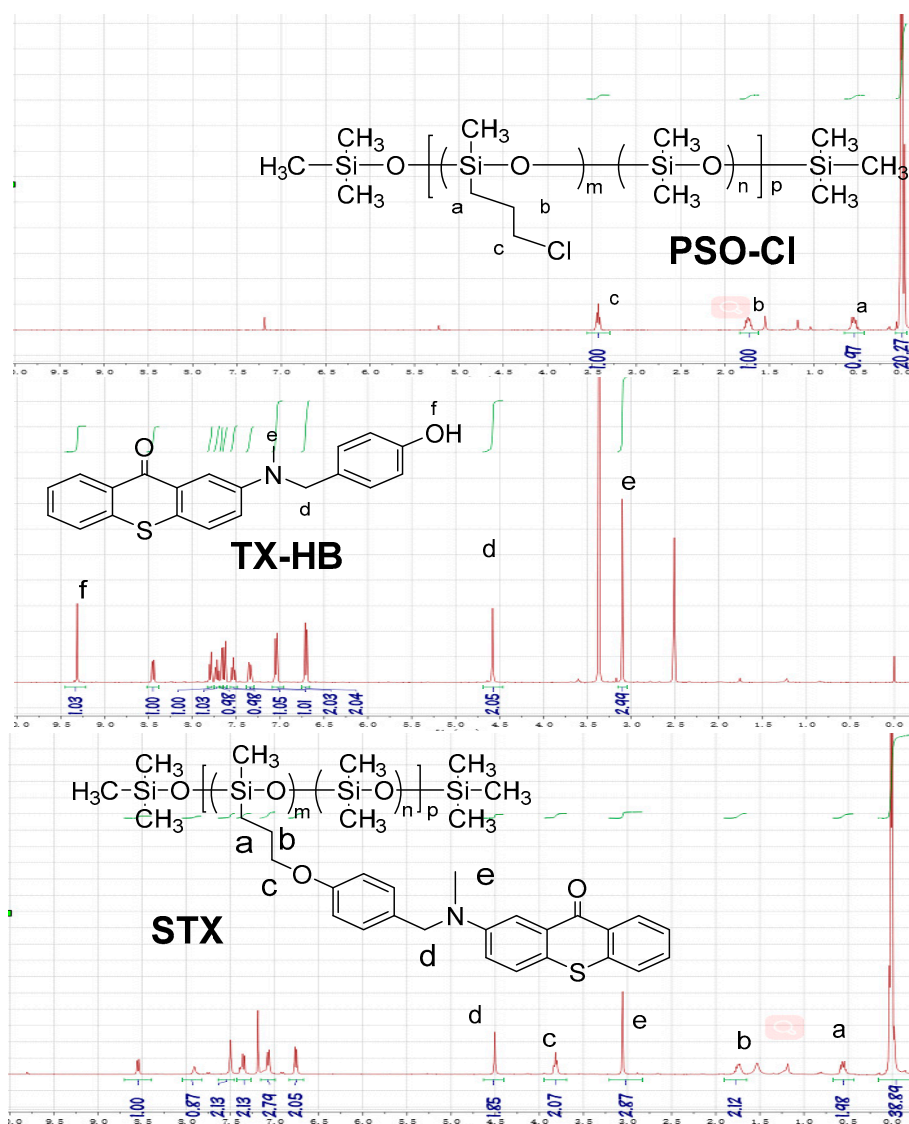

Figure S1.  $^1\text{H}$  NMR spectra of PSO-Cl ( $\text{CDCl}_3$ ), TX-HB (DMSO) and STX ( $\text{CDCl}_3$ ).

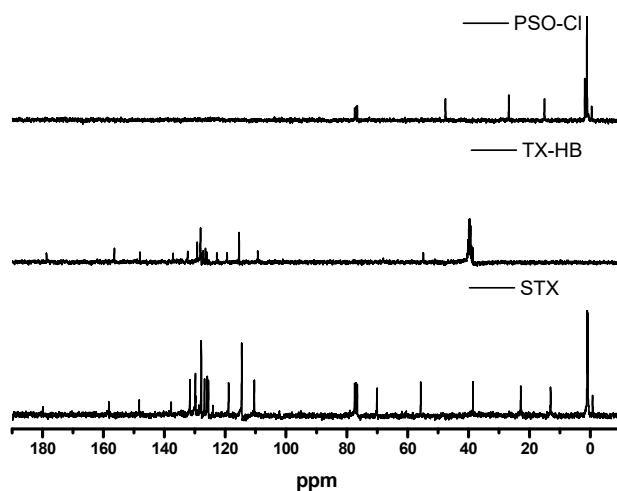

**Figure S2.**  $^{13}\text{C}$  NMR spectra of PSO-Cl ( $\text{CDCl}_3$ ), TX-HB (DMSO) and STX ( $\text{CDCl}_3$ ).

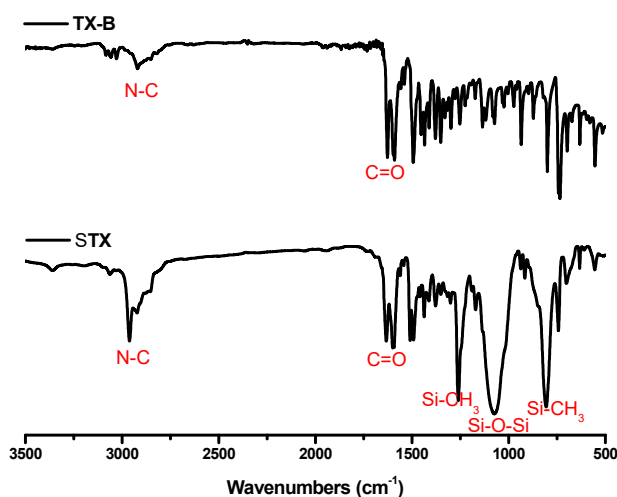

**Figure S3.** FTIR spectra of TX-B and STX.

STX (0.0074 g) was dissolved in THF and diluted to 50.00 mL. Then the UV-vis spectrum of STX was measured to determine the content of ATX moiety (Fig. S5). It is calculated according to Lambert-Beer law:

$$A = \varepsilon bC = \frac{\varepsilon bn}{V} \quad (1)$$

where molar extinction coefficient of TX-B ( $\varepsilon = 4848 \text{ L} \cdot \text{mol}^{-1} \cdot \text{cm}^{-1}$ ) is used as a standard of thioxanthone group,  $b$  is optical path length, which is 1 cm, and  $V$  is 50

mL. The number mole of thioxanthone group in STX is  $8.37 \times 10^{-6}$ . The average number of ATX moiety in STX is calculated to be about 3.3.

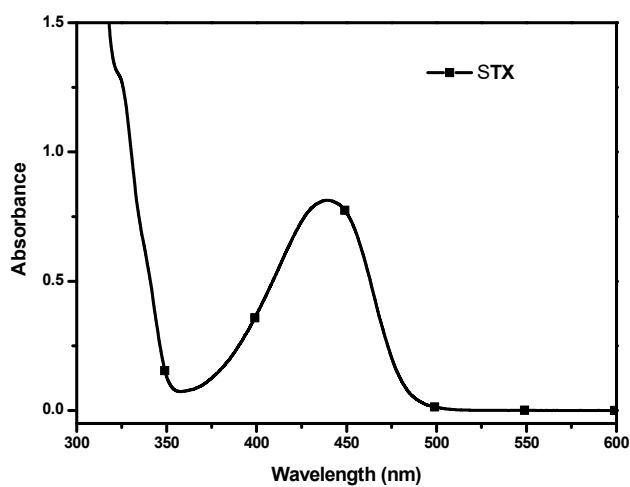

**Figure S4.** UV-vis of STX in THF.

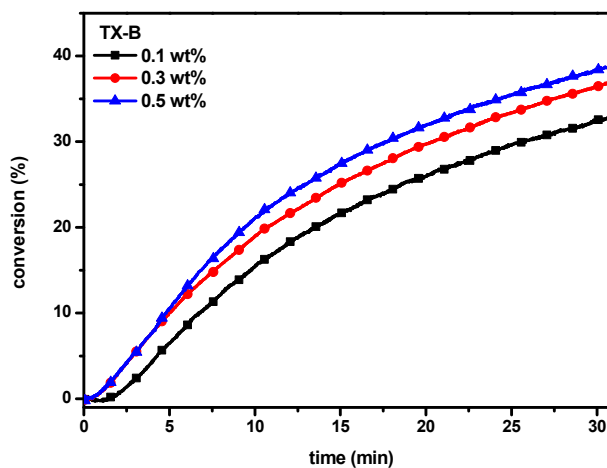

**Figure S5.** Conversion-time and rate-time for polymerization of TMPTA in THF (THF % = 25 wt%) in laminate initiated by TX-B in different concentrations.

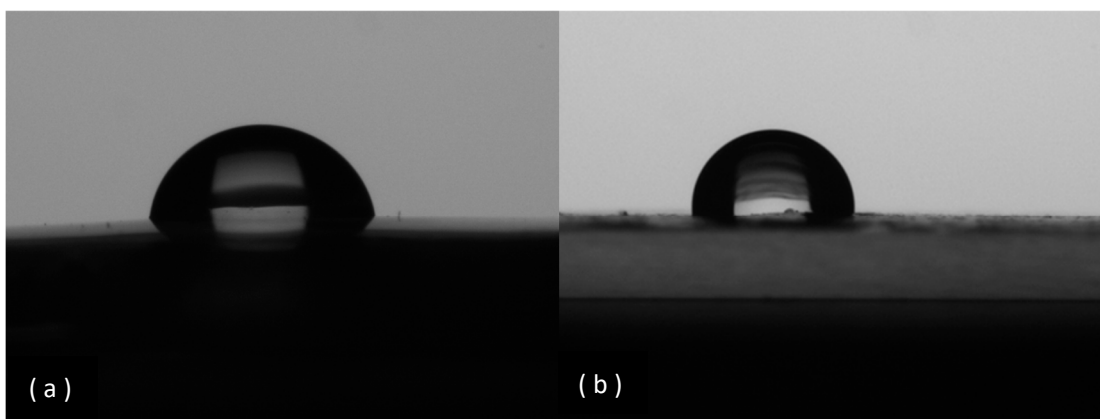

**Figure S6.** The contact angle images of the polymer film initiated by photoinitiator; (a): TX-B (81.8°); (b): STX, [STX] =  $6 \times 10^{-5}$  mol/g, (102.3°).

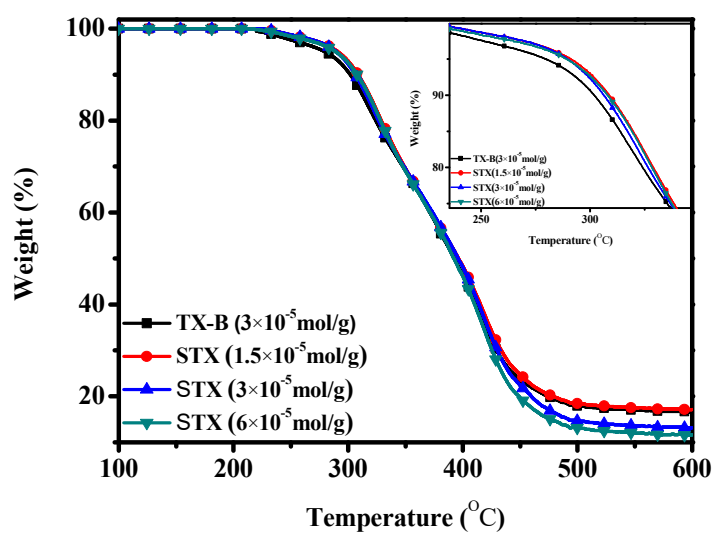

**Figure S7.** TGA curves of polymer films initiated by TX-B and STX.

**Table S1.** The thermal data of TX-B and STX.

| PI   | Temperature         |                      | Char (%) |
|------|---------------------|----------------------|----------|
|      | T <sub>5</sub> (°C) | T <sub>50</sub> (°C) |          |
| TX-B | 273                 | 326                  | 0.01     |
| STX  | 229                 | 373                  | 1.29     |

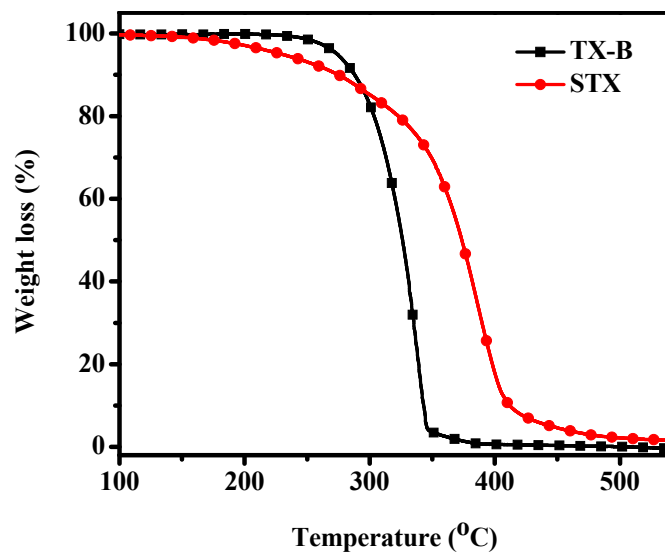

Figure S8. TGA curves of TX-B and STX.

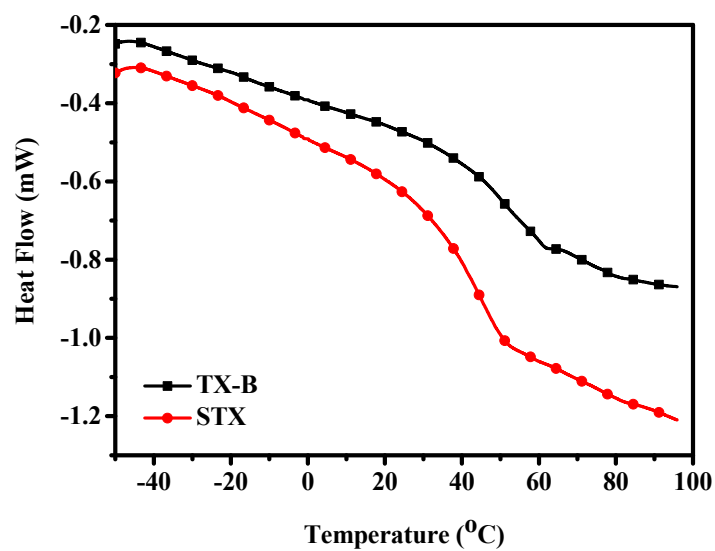

Figure S9. DSC curves of cured PUA films initiated by TX-B and STX ( $[TX-B] = 3 \times 10^{-5} \text{ mol g}^{-1}$ ,  $[STX] = 3 \times 10^{-5} \text{ mol g}^{-1}$ ). [STX] refers to the molar concentration of the ATX moiety.
